# Supplementary material for: The TRPA1 cation channel is upregulated by cigarette smoke in mouse and human macrophages modulating lung inflammation
Source: Springer Nature journal article supplement (doi:10.1038/s41598-025-95662-y), 2025-03-27
Supplement: MOESM1 [file 41598_2025_95662_MOESM1_ESM.pdf]

**Supplementary table 1. Comparison of TRPA1 expression of *Trpa1*<sup>+/+</sup> mouse lungs after 1, 2 and 3 months of smoke exposure.** The table shows the statistics performed using the means with SD of n=5-9 mice/group.  $p < 0.05$  (ordinary one-way ANOVA followed by Tukey's multiple comparisons test) was considered significant indicated by \* and effect size was calculated using Hedges' *g*.

| Group comparisons                                     | Intact            | 1 month of CSE    | 2 months of CSE |
|-------------------------------------------------------|-------------------|-------------------|-----------------|
| 1 month of CSE<br><i>p</i> value<br>Hedges' <i>g</i>  | 0.9999<br>0.17    |                   |                 |
| 2 months of CSE<br><i>p</i> value<br>Hedges' <i>g</i> | 0.0713<br>1.1 ↑↑  | 0.1772<br>0.92 ↑↑ |                 |
| 3 months of CSE<br><i>p</i> value<br>Hedges' <i>g</i> | 0.0753<br>1.74 ↑↑ | 0.1779<br>1.44 ↑↑ | >0.9999<br>0.02 |

**Supplementary figure 1. Expression of *Trpa1*.** A. *Trpa1* mRNA levels in intact mouse tissue detected by qPCR. Each column represents mean±SEM, n=4.

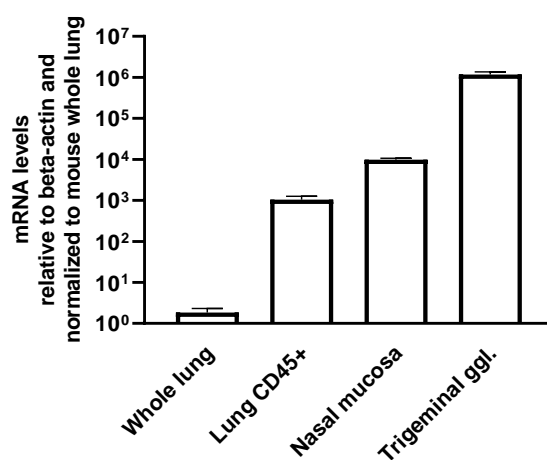

**Supplementary table 2. Comparison of CD68 immunostaining demonstrating macrophages in intact and cigarette smoke exposed mouse lung tissues.** The table shows the statistics performed using the means with SD of n=5 tissue sections/group, 20 images/section.  $p < 0.05$  (two-way ANOVA followed by Tukey's multiple comparisons test) was considered significant indicated by \* and effect size was calculated using Hedges'  $g$ .

| Groups                                                                                                                                    | Comparisons of CD68 immunostaining of CSE treated Trpa1 <sup>+/+</sup> mice |                 |                 |                 |
|-------------------------------------------------------------------------------------------------------------------------------------------|-----------------------------------------------------------------------------|-----------------|-----------------|-----------------|
|                                                                                                                                           | Intact                                                                      | 1 month of CSE  |                 | 2 months of CSE |
| 1 month of CSE<br><i>p</i> value<br>Hedges' <i>g</i>                                                                                      | 0.0048**<br>1.26 ↑                                                          |                 |                 |                 |
| 2 months of CSE<br><i>p</i> value<br>Hedges' <i>g</i>                                                                                     | 0.2495<br>1.42 ↑                                                            | 0.7989<br>0.46  |                 |                 |
| 3 months of CSE<br><i>p</i> value<br>Hedges' <i>g</i>                                                                                     | 0.0028**<br>1.67 ↑                                                          | >0.9999<br>0.02 |                 | 0.7133<br>0.6 ↑ |
| Groups                                                                                                                                    | Comparisons of CD68 immunostaining of CSE treated Trpa1 <sup>-/-</sup> mice |                 |                 |                 |
|                                                                                                                                           | Intact                                                                      | 1 month of CSE  |                 | 2 months of CSE |
| 1 month of CSE<br><i>p</i> value<br>Hedges' <i>g</i>                                                                                      | 0.9998<br>0.14                                                              |                 |                 |                 |
| 2 months of CSE<br><i>p</i> value<br>Hedges' <i>g</i>                                                                                     | 0.9892<br>0.35                                                              | 0.9998<br>0.16  |                 |                 |
| 3 months of CSE<br><i>p</i> value<br>Hedges' <i>g</i>                                                                                     | >0.9999<br>0.07                                                             | 0.9949<br>0.2   |                 | 0.9295<br>0.38  |
|                                                                                                                                           | Intact                                                                      | 1 month of CSE  | 2 months of CSE | 3 months of CSE |
| Comparisons of CD68 immunostaining of CSE treated Trpa1 <sup>+/+</sup> to Trpa1 <sup>-/-</sup> mice<br><i>p</i> value<br>Hedges' <i>g</i> | 0.06<br>1.37 ↑↑                                                             | 0.946<br>0.3    | >0.9999<br>0.04 | 0.9995<br>0.14  |

**Supplementary table 3. Comparison of IL-1 $\beta$  mRNA expression of intact and cigarette smoke exposed mouse lung tissues.** The table shows the statistics performed using the means with SD of n=5. p<0.05 (two-way ANOVA followed by Tukey's multiple comparisons test) was considered significant indicated by \* and effect size was calculated using Hedges' *g*.

| Groups                                                                                                                                             | Comparisons of IL-1 $\beta$ mRNA expression of CSE treated Trpa1 <sup>+/+</sup> mice |                              |                           |                            |
|----------------------------------------------------------------------------------------------------------------------------------------------------|--------------------------------------------------------------------------------------|------------------------------|---------------------------|----------------------------|
|                                                                                                                                                    | Intact                                                                               | 1 month of CSE               | 2 months of CSE           |                            |
| 1 month of CSE<br><i>p</i> value<br>Hedges' <i>g</i>                                                                                               | 0.8141<br>1.1 $\uparrow\uparrow$                                                     |                              |                           |                            |
| 2 months of CSE<br><i>p</i> value<br>Hedges' <i>g</i>                                                                                              | 0.9999<br>0.36                                                                       | 0.9604<br>0.74 $\downarrow$  |                           |                            |
| 3 months of CSE<br><i>p</i> value<br>Hedges' <i>g</i>                                                                                              | 0.9999<br>0.37                                                                       | >0.9999<br>0.75 $\downarrow$ | >0.9999<br>0.0            |                            |
| Groups                                                                                                                                             | Comparisons of IL-1 $\beta$ mRNA expression of CSE treated Trpa1 <sup>-/-</sup> mice |                              |                           |                            |
|                                                                                                                                                    | Intact                                                                               | 1 month of CSE               | 2 months of CSE           |                            |
| 1 month of CSE<br><i>p</i> value<br>Hedges' <i>g</i>                                                                                               | 0.9997<br>0.22                                                                       |                              |                           |                            |
| 2 months of CSE<br><i>p</i> value<br>Hedges' <i>g</i>                                                                                              | >0.9999<br>0.07                                                                      | 0.9987<br>0.31               |                           |                            |
| 3 months of CSE<br><i>p</i> value<br>Hedges' <i>g</i>                                                                                              | 0.9931<br>0.45                                                                       | 0.9119<br>0.69 $\downarrow$  | 0.9978<br>0.44            |                            |
|                                                                                                                                                    | Intact                                                                               | 1 month of CSE               | 2 months of CSE           | 3 months of CSE            |
| Comparisons of IL-1 $\beta$ mRNA expression of CSE treated Trpa1 <sup>+/+</sup> to Trpa1 <sup>-/-</sup> mice<br><i>p</i> value<br>Hedges' <i>g</i> | 0.8693<br>0.83 $\uparrow\uparrow$                                                    | >0.9999<br>0.18              | 0.9913<br>0.56 $\uparrow$ | >0.9999<br>0.75 $\uparrow$ |

**Supplementary table 4. Comparison of IL-23 mRNA expression of intact and cigarette smoke exposed mouse lung tissues.** The table shows the statistics performed using the means with SD of n=5. p<0.05 (two-way ANOVA followed by Tukey's multiple comparisons test) was considered significant indicated by \* and effect size was calculated using Hedges' *g*.

| Groups                                                                                                                                      | Comparisons of IL-23 mRNA expression of CSE treated Trpa1 <sup>+/+</sup> mice |                    |                   |                 |
|---------------------------------------------------------------------------------------------------------------------------------------------|-------------------------------------------------------------------------------|--------------------|-------------------|-----------------|
|                                                                                                                                             | Intact                                                                        | 1 month of CSE     | 2 months of CSE   |                 |
| 1 month of CSE<br><i>p</i> value<br>Hedges' <i>g</i>                                                                                        | 0.217<br>1.35 ↑↑                                                              |                    |                   |                 |
| 2 months of CSE<br><i>p</i> value<br>Hedges' <i>g</i>                                                                                       | 0.9843<br>0.7 ↓                                                               | 0.0316*<br>1.77 ↓↓ |                   |                 |
| 3 months of CSE<br><i>p</i> value<br>Hedges' <i>g</i>                                                                                       | 0.9138<br>0.77 ↑                                                              | 0.8932<br>0.6 ↓    | 0.4153<br>1.27 ↑↑ |                 |
| Groups                                                                                                                                      | Comparisons of IL-23 mRNA expression of CSE treated Trpa1 <sup>-/-</sup> mice |                    |                   |                 |
|                                                                                                                                             | Intact                                                                        | 1 month of CSE     | 2 months of CSE   |                 |
| 1 month of CSE<br><i>p</i> value<br>Hedges' <i>g</i>                                                                                        | 0.9583<br>1.12 ↑↑                                                             |                    |                   |                 |
| 2 months of CSE<br><i>p</i> value<br>Hedges' <i>g</i>                                                                                       | 0.8866<br>1.27 ↑↑                                                             | >0.9999<br>0.22    |                   |                 |
| 3 months of CSE<br><i>p</i> value<br>Hedges' <i>g</i>                                                                                       | 0.4057<br>1.37 ↑↑                                                             | 0.9564<br>0.79m ↑  | 0.9894<br>0.51 ↑  |                 |
|                                                                                                                                             | Intact                                                                        | 1 month of CSE     | 2 months of CSE   | 3 months of CSE |
| Comparisons of IL-23 mRNA expression of CSE treated Trpa1 <sup>+/+</sup> to Trpa1 <sup>-/-</sup> mice<br><i>p</i> value<br>Hedges' <i>g</i> | 0.964<br>0.87<br>m↑↑                                                          | 0.2289<br>1.45 ↑↑  | 0.9348<br>0.83 ↑↑ | >0.9999<br>0.07 |

**Supplementary table 5. Comparison of IL-10 mRNA expression of intact and cigarette smoke exposed mouse lung tissues.** The table shows the statistics performed using the means with SD of n=5. p<0.05 (two-way ANOVA followed by Tukey's multiple comparisons test) was considered significant indicated by \* and effect size was calculated using Hedges' *g*.

| Groups                                                                                                                                      | Comparisons of IL-10 mRNA expression of CSE treated Trpa1 <sup>+/+</sup> mice |                   |                   |                    |
|---------------------------------------------------------------------------------------------------------------------------------------------|-------------------------------------------------------------------------------|-------------------|-------------------|--------------------|
|                                                                                                                                             | Intact                                                                        | 1 month of CSE    | 2 months of CSE   |                    |
| 1 month of CSE<br><i>p</i> value<br>Hedges' <i>g</i>                                                                                        | 0.9107<br>0.91 ↓↓                                                             |                   |                   |                    |
| 2 months of CSE<br><i>p</i> value<br>Hedges' <i>g</i>                                                                                       | >0.9999<br>0.02                                                               | 0.9025<br>0.89 ↑↑ |                   |                    |
| 3 months of CSE<br><i>p</i> value<br>Hedges' <i>g</i>                                                                                       | 0.3554<br>2.05 ↓↓                                                             | 0.9721<br>1.13 ↓↓ | 0.3427<br>1.95 ↓↓ |                    |
| Groups                                                                                                                                      | Comparisons of IL-10 mRNA expression of CSE treated Trpa1 <sup>-/-</sup> mice |                   |                   |                    |
|                                                                                                                                             | Intact                                                                        | 1 month of CSE    | 2 months of CSE   |                    |
| 1 month of CSE<br><i>p</i> value<br>Hedges' <i>g</i>                                                                                        | 0.9125<br>0.51 ↑                                                              |                   |                   |                    |
| 2 months of CSE<br><i>p</i> value<br>Hedges' <i>g</i>                                                                                       | 0.9851<br>0.71 ↓                                                              | 0.4179<br>0.96 ↓↓ |                   |                    |
| 3 months of CSE<br><i>p</i> value<br>Hedges' <i>g</i>                                                                                       | 0.3851<br>1.61 ↓↓                                                             | 0.0318*<br>1.5 ↓↓ | 0.8923<br>1.38 ↓↓ |                    |
|                                                                                                                                             | Intact                                                                        | 1 month of CSE    | 2 months of CSE   | 3 months of CSE    |
| Comparisons of IL-10 mRNA expression of CSE treated Trpa1 <sup>+/+</sup> to Trpa1 <sup>-/-</sup> mice<br><i>p</i> value<br>Hedges' <i>g</i> | 0.999<br>0.3654                                                               | 0.0754<br>1.32 ↑↑ | >0.9999<br>0.27   | 0.9983<br>0.7864 ↑ |

**Supplementary table 6. Comparison of TGF- $\beta$ 1 mRNA expression of intact and cigarette smoke exposed mouse lung tissues.** The table shows the statistics performed using the means with SD of n=5.  $p < 0.05$  (two-way ANOVA followed by Tukey's multiple comparisons test) was considered significant indicated by \* and effect size was calculated using Hedges'  $g$ .

| Groups                                                                                                                                       | Comparisons of TGF-β1 mRNA expression of CSE treated Trpa1 <sup>+/+</sup> mice |                   |                 |                   |
|----------------------------------------------------------------------------------------------------------------------------------------------|--------------------------------------------------------------------------------|-------------------|-----------------|-------------------|
|                                                                                                                                              | Intact                                                                         | 1 month of CSE    |                 | 2 months of CSE   |
| 1 month of CSE<br><i>p</i> value<br>Hedges' <i>g</i>                                                                                         | 0.9949<br>0.61 ↓                                                               |                   |                 |                   |
| 2 months of CSE<br><i>p</i> value<br>Hedges' <i>g</i>                                                                                        | >0.9999<br>0.24                                                                | 0.9578<br>0.67 ↑  |                 |                   |
| 3 months of CSE<br><i>p</i> value<br>Hedges' <i>g</i>                                                                                        | 0.3173<br>2.16 ↑↑                                                              | 0.0761<br>2.27 ↑↑ |                 | 0.5098<br>1.32 ↑↑ |
| Groups                                                                                                                                       | Comparisons of TGF-β1 mRNA expression of CSE treated Trpa1 <sup>-/-</sup> mice |                   |                 |                   |
|                                                                                                                                              | Intact                                                                         | 1 month of CSE    |                 | 2 months of CSE   |
| 1 month of CSE<br><i>p</i> value<br>Hedges' <i>g</i>                                                                                         | 0.9768<br>0.52 ↑                                                               |                   |                 |                   |
| 2 months of CSE<br><i>p</i> value<br>Hedges' <i>g</i>                                                                                        | >0.9999<br>0.21                                                                | 0.9982<br>0.32    |                 |                   |
| 3 months of CSE<br><i>p</i> value<br>Hedges' <i>g</i>                                                                                        | >0.9999<br>0.06                                                                | 0.9875<br>0.45    |                 | >0.9999<br>0.14   |
|                                                                                                                                              | Intact                                                                         | 1 month of CSE    | 2 months of CSE | 3 months of CSE   |
| Comparisons of TGF-β1 mRNA expression of CSE treated Trpa1 <sup>+/+</sup> to Trpa1 <sup>-/-</sup> mice<br><i>p</i> value<br>Hedges' <i>g</i> | 0.9999<br>0.34                                                                 | 0.9018<br>0.69 ↑  | 0.9999<br>0.24  | 0.1785<br>1.86 ↓↓ |

**Supplementary table 7. Comparisons of TRPA1 and TGF- $\beta$ 1 expression changes in control and cigarette smoke-exposure (CSE) treated 3-dimensional SN/SNM spheroids.** The table shows the statistics performed using the means with SD of n=4-15.  $p < 0.05$  (ordinary one-way ANOVA followed by Tukey's multiple comparisons test) was considered significant indicated by \* and effect size was calculated using Hedges'  $g$ .

| Groups                                      | TRPA1 immunostaining                |                                       |                                       |
|---------------------------------------------|-------------------------------------|---------------------------------------|---------------------------------------|
|                                             | Non-smoking SN                      | Smoking SN                            | Non-smoking SNM                       |
| Smoking SN<br>$p$ value<br>Hedges' $g$      | 0.5<br>1.29 $\uparrow\uparrow$      |                                       |                                       |
| Non-smoking SNM<br>$p$ value<br>Hedges' $g$ | 0.0039**<br>2.43 $\uparrow\uparrow$ |                                       |                                       |
| Smoking SNM<br>$p$ value<br>Hedges' $g$     |                                     | <0.0001***<br>6.29 $\uparrow\uparrow$ | <0.0001***<br>3.63 $\uparrow\uparrow$ |
| Groups                                      | TRPA1 mRNA expression               |                                       |                                       |
|                                             | Non-smoking SN                      | Smoking SN                            | Non-smoking SNM                       |
| Smoking SN<br>$p$ value<br>Hedges' $g$      | 0.6065<br>1.22 $\uparrow\uparrow$   |                                       |                                       |
| Non-smoking SNM<br>$p$ value<br>Hedges' $g$ | 0.9747<br>0.52 $\uparrow$           |                                       |                                       |
| Smoking SNM<br>$p$ value<br>Hedges' $g$     |                                     | 0.1354<br>1.11 $\uparrow\uparrow$     | 0,0053**<br>2.0 $\uparrow\uparrow$    |
| Groups                                      | TGF $\beta$ mRNA expression         |                                       |                                       |
|                                             | Non-smoking SN                      | Smoking SN                            | Non-smoking SNM                       |
| Smoking SN<br>$p$ value<br>Hedges' $g$      | 0,9994<br>0.09                      |                                       |                                       |
| Non-smoking SNM<br>$p$ value<br>Hedges' $g$ | >0.9999<br>0.00                     |                                       |                                       |
| Smoking SNM<br>$p$ value<br>Hedges' $g$     |                                     | 0.7323<br>0.60 $\uparrow$             | 0.7933<br>0.52 $\uparrow$             |
